# Supplementary material for: Preparation of a polymer nanocomposite via the polymerization of pyrrole : biphenyldisulfonic acid : pyrrole as a two-monomer-connected precursor on MoS2 for electrochemical energy storage
Source: Royal Society of Chemistry journal article supplement (doi:10.1039/d0nr08941a), 2021-01-01
Supplement: d0nr08941a1.pdf [file d0nr08941a1.pdf]

**Electronic Supplementary Information (ESI) for**

**Preparation of polymer nanocomposite via the polymerization of pyrrole:biphenyldisulfonic acid:pyrrole as two-monomer-connected precursor on MoS<sub>2</sub> for electrochemical energy storage**

Wonbin Kim,<sup>a</sup> Hong-Joon Lee,<sup>a</sup> Seung Jo Yoo,<sup>b</sup> Cuc Kim Trinh,<sup>a</sup> Zubair Ahmad<sup>a</sup> and Jae-Suk Lee<sup>\*a</sup>

<sup>a</sup>School of Materials Science and Engineering, Gwangju Institute of Science and Technology (GIST), 123 Cheomdangwagi-ro, Buk-gu, Gwangju 61005, Korea

<sup>b</sup>Center of Research Equipment, Korea Basic Science Institute (KBSI), 169-148 Gwahak-ro, Yuseong-gu, Daejeon 34133, Korea.

\*Corresponding Author. E-mail: [jslee@gist.ac.kr](mailto:jslee@gist.ac.kr)

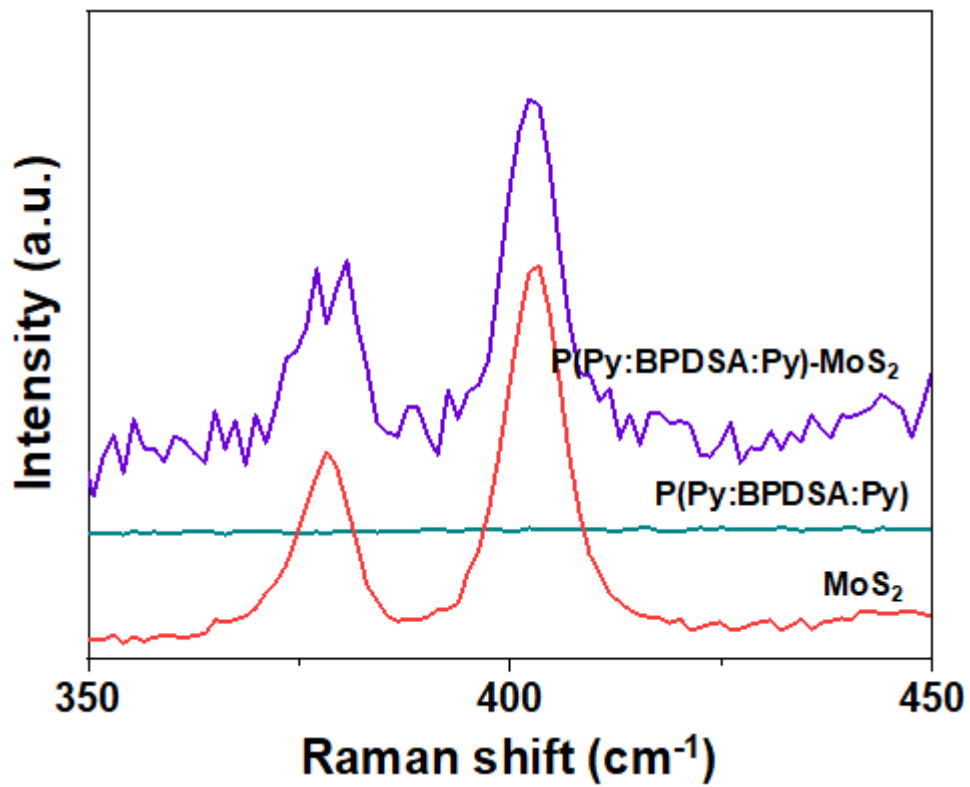

**Fig. S1** Raman spectroscopy of P(Py:BPDSA:Py)-MoS<sub>2</sub> (MoS<sub>2</sub> 50%), P(Py:BPDSA:Py) and MoS<sub>2</sub>, range from 350 to 450 cm<sup>-1</sup>.

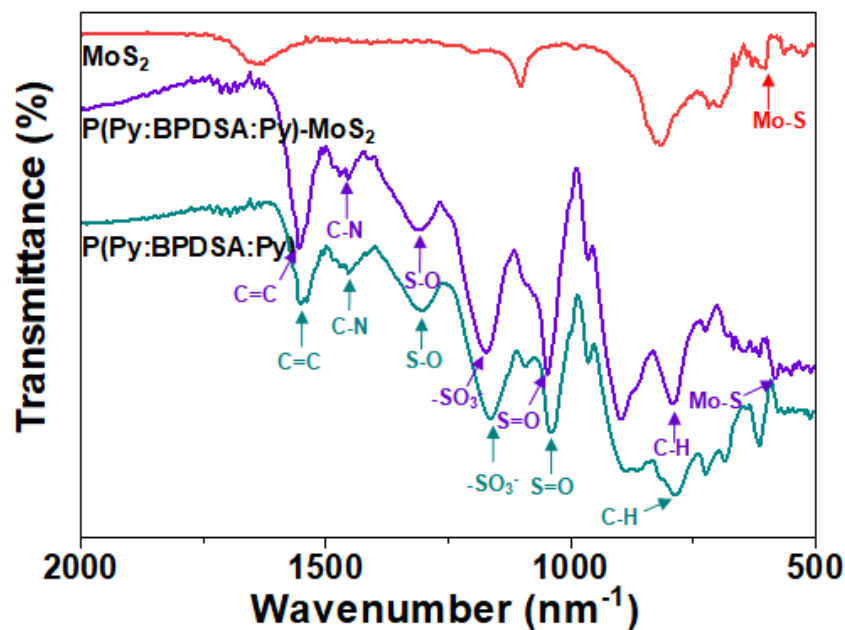

**Fig. S2** FT-IR spectroscopy of P(Py:BPDSA:Py)-MoS<sub>2</sub> (MoS<sub>2</sub> 50%), P(Py:BPDSA:Py) and MoS<sub>2</sub>. range from 500 to 2000 nm<sup>-1</sup>. Most of the characteristic peaks related to the polymer, P(Py:BPDSA:Py), were shifted in the composite, P(Py:BPDSA:Py)-MoS<sub>2</sub>, demonstrating the interaction between the MoS<sub>2</sub> and polymer. In the spectra of P(Py:BPDSA:Py)-MoS<sub>2</sub>, the characteristic peaks of P(Py:BPDSA:Py) were observed and shifted from 1546 (C=C), 1455 (C-N), 1303 (S-O), 1164 (-SO<sub>3</sub>), 1039 (S=O), 788 nm<sup>-1</sup> (C-H) to 1552 (C=C), 1463 (C-N), 1311 (S-O), 1174 (-SO<sub>3</sub>), 1049 (S=O), 794 nm<sup>-1</sup> (C-H).<sup>1-3</sup> The Mo-S vibration peak associated with MoS<sub>2</sub> was also observed at about 600 nm<sup>-1</sup> in the P(Py:BPDSA:Py)-MoS<sub>2</sub>.<sup>4-6</sup>

1. H. Tang, J. Wang, H. Yin, H. Zhao, D. Wang and Z. Tang, *Adv. Mater.*, 2015, **27**, 1117-1123.
2. H.-J. Lee, Y.-R. Jo, S. Kumar, S. J. Yoo, J.-G. Kim, Y.-J. Kim, B.-J. Kim and J.-S. Lee, *Nat. Commun.*, 2016, **7**, 1-6.
3. R. Zeng, Z. Li, L. Li, Y. Li, J. Huang, Y. Xiao, K. Yuan and Y. Chen, *ACS Sustainable Chem. Eng.*, 2019, **7**, 11540-11549.
4. N. Maity, A. Mandal and A. K. Nandi, *J. Mater. Chem. C*, 2017, **5**, 12121-12133.
5. S. S. Karade, D. P. Dubal and B. R. Sankapal, *RSC Adv.*, 2016, **6**, 39159-39165.
6. Y. Chen, W. Ma, K. Cai, X. Yang and C. Huang, *Electrochim. Acta*, 2017, **246**, 615-624.

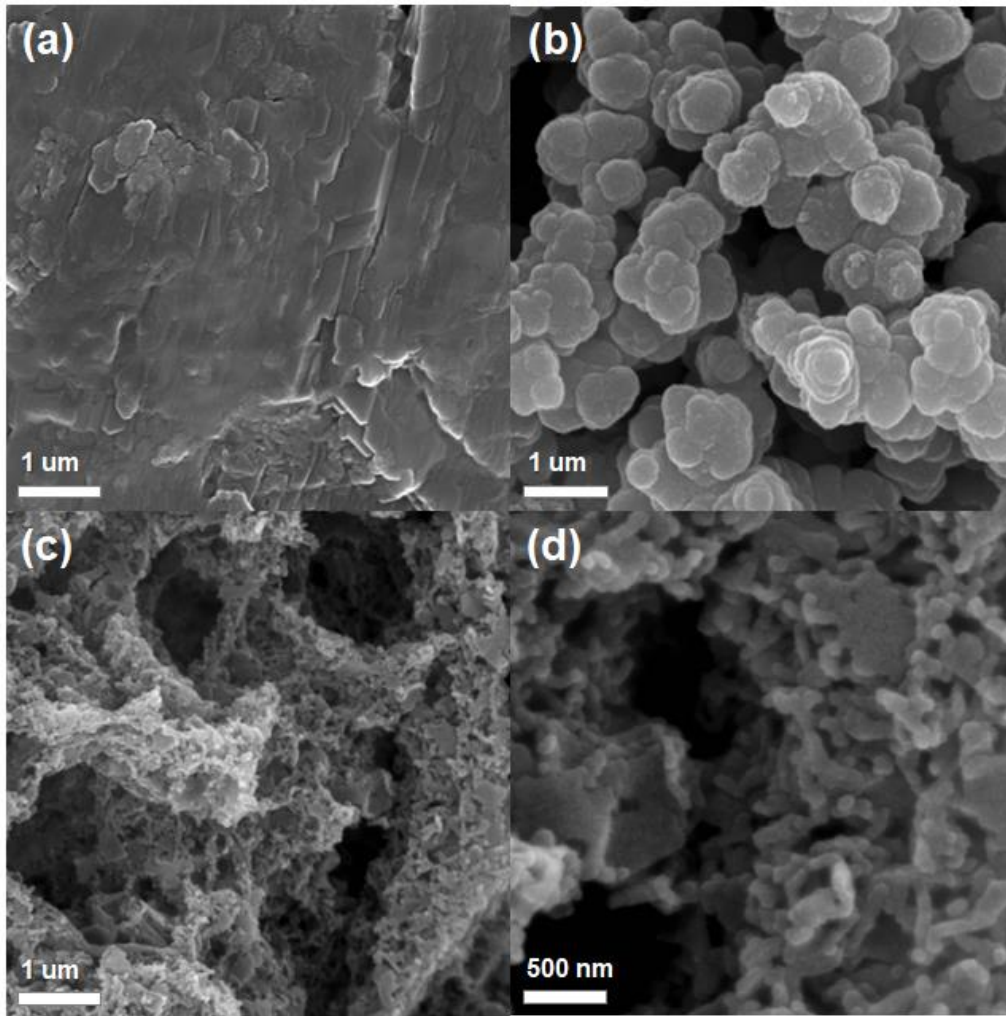

**Fig. S3** SEM image of (a) MoS<sub>2</sub>, (b) P(Py:BPDSA:Py), (c) P(Py:BPDSA:Py)-MoS<sub>2</sub> (MoS<sub>2</sub> 50%). Scale bar, 1 μm. (d) P(Py:BPDSA:Py)-MoS<sub>2</sub> (MoS<sub>2</sub> 50%). Scale bar, 500 nm.

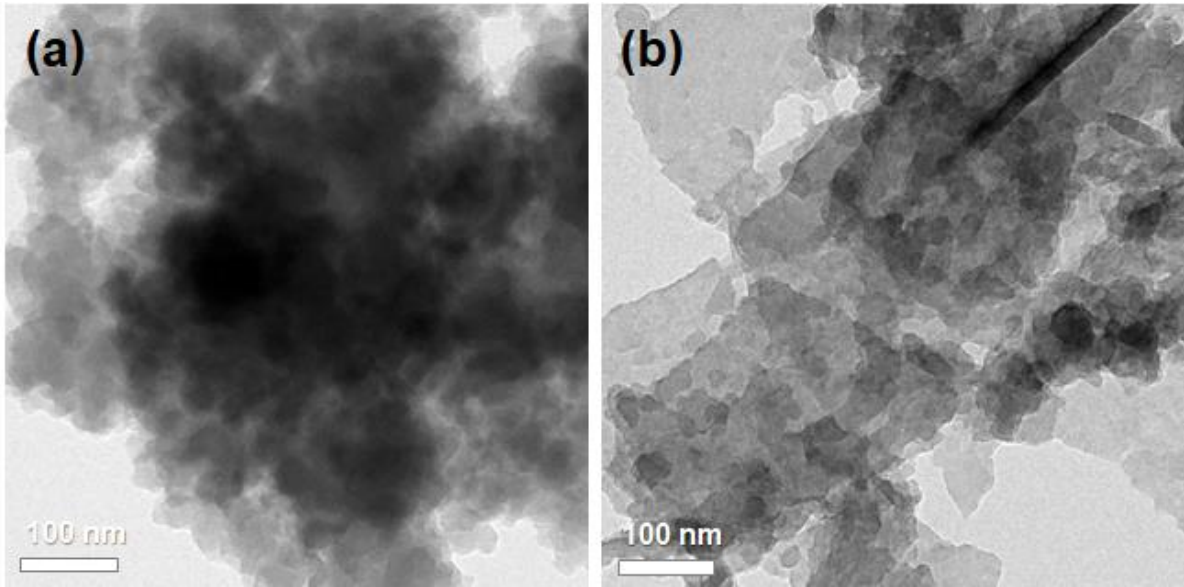

**Fig. S4** TEM image of (a) P(Py:BPDSA:Py) and (b) P(Py:BPDSA:Py)-MoS<sub>2</sub> (MoS<sub>2</sub> 50%).

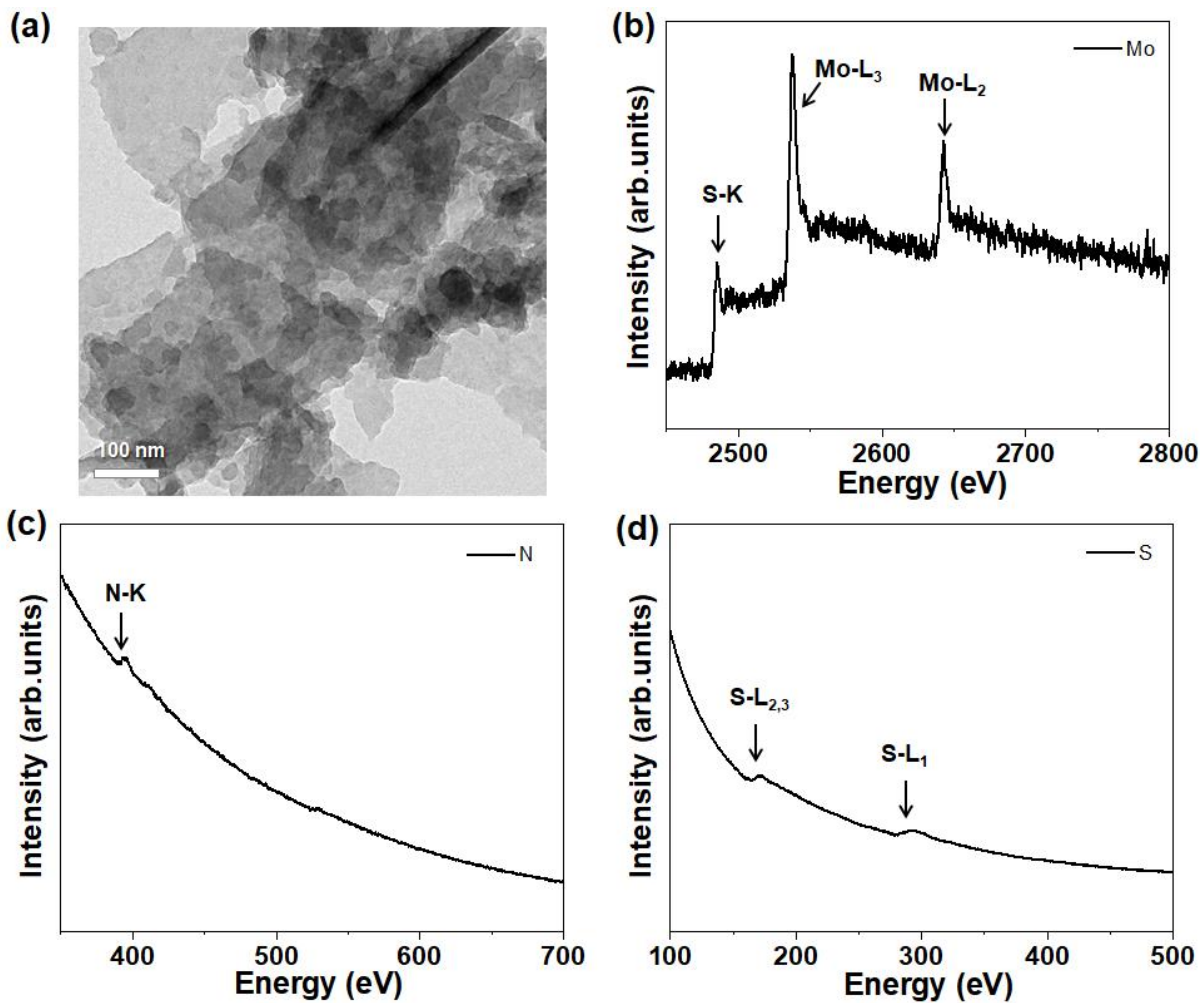

**Fig. S5** (a) TEM image of P(Py:BPDSA:Py)-MoS<sub>2</sub> (MoS<sub>2</sub> 50%). Electron energy loss spectroscopy (EELS)

P(Py:BPDSA:Py)-MoS<sub>2</sub> (MoS<sub>2</sub> 50%), (b) Molybdenum (Mo), (c) Nitrogen (N), and (d) Sulfur (S).

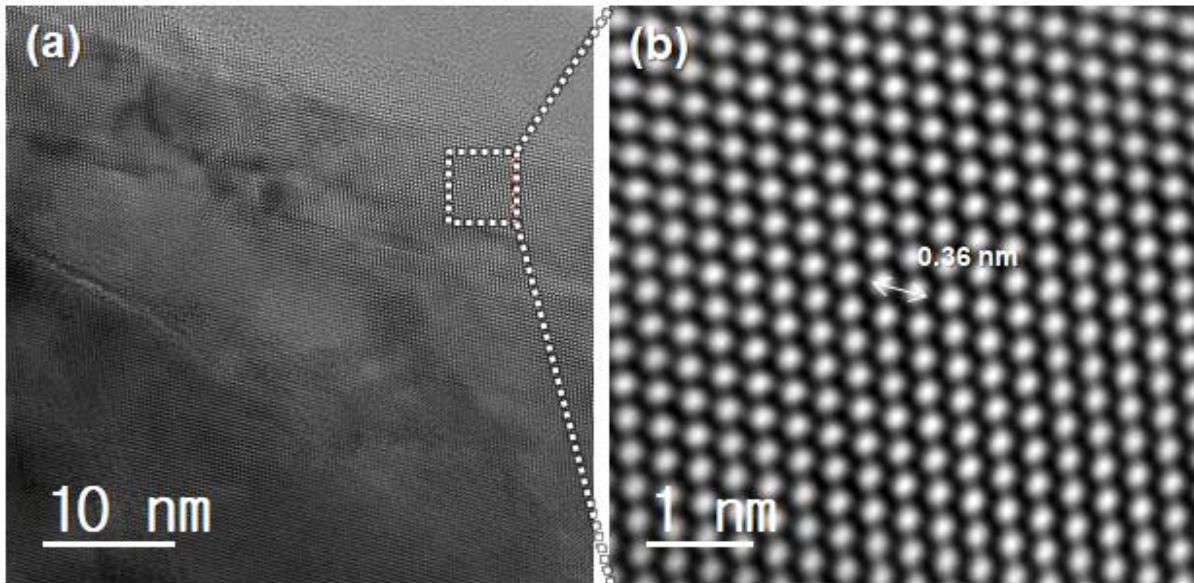

**Fig. S6** Molecular-level ordering of P(Py:BPDSA:Py)-MoS<sub>2</sub> (MoS<sub>2</sub> 50%). (a) HRTEM image measured along [011] zone axis, (b) Intensity profile of the lines for the white line covered area in figure (a). The fourth-order reflection on (400)  $d$  spacing of 0.36 nm is observed in the [100] direction. This is similar to the  $d$  spacing of the polymer, P(Py:BPDSA:Py), crystal structure.<sup>1</sup>

1. H.-J. Lee, Y.-R. Jo, S. Kumar, S. J. Yoo, J.-G. Kim, Y.-J. Kim, B.-J. Kim and J.-S. Lee, *Nat. Commun.*, 2016, **7**, 1-6.



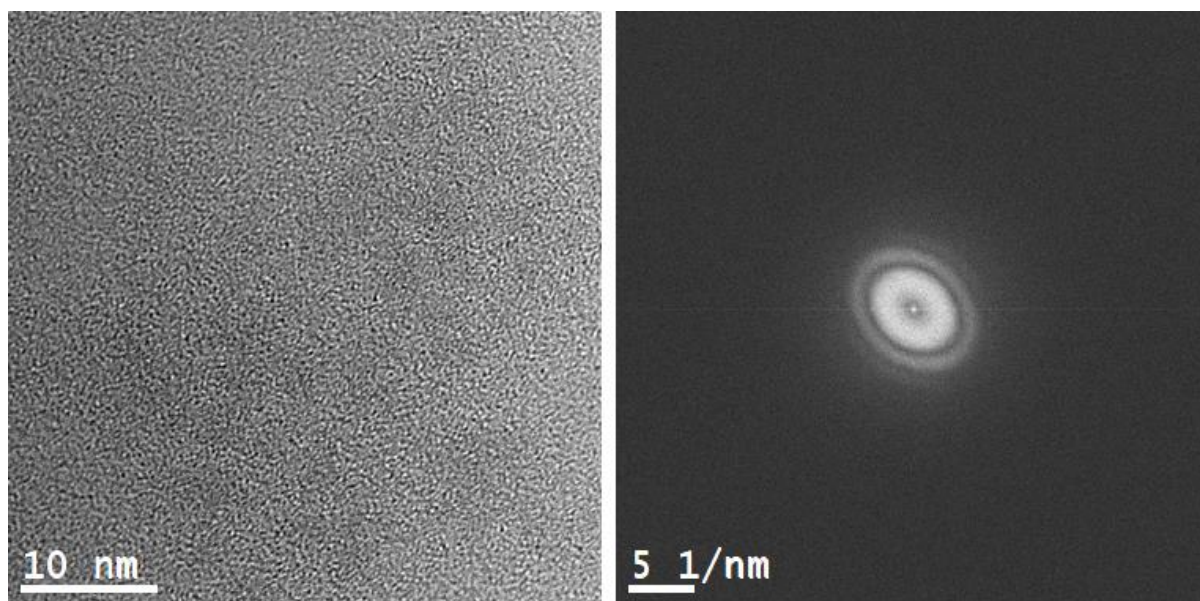

**Fig. S7** HRTEM and FFT pattern image of P(Py:MSA)-MoS<sub>2</sub> (MoS<sub>2</sub> 50%).



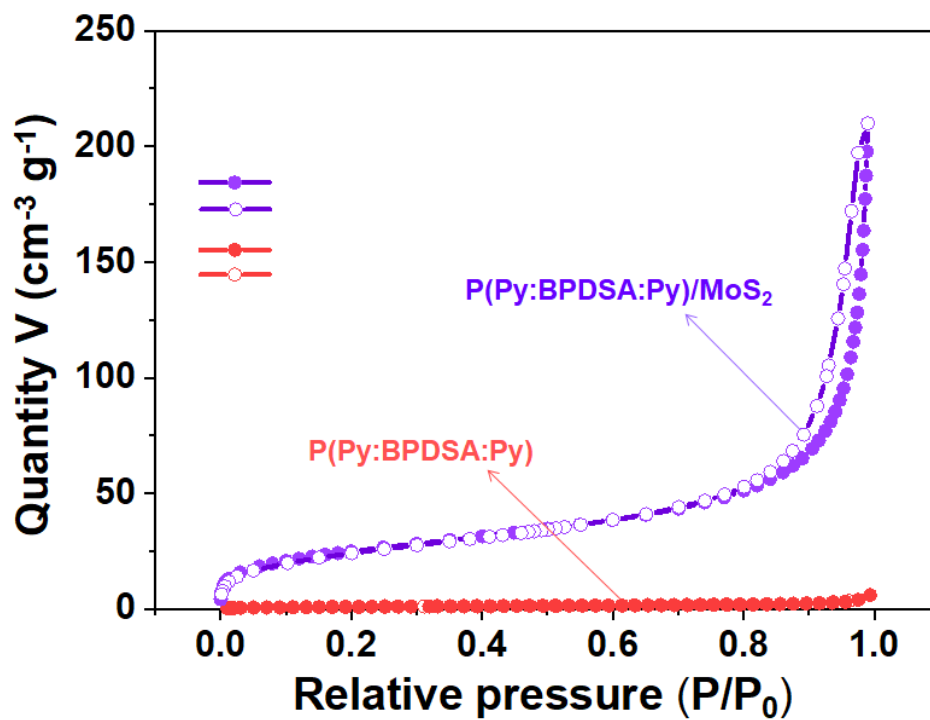

Fig. S8 N<sub>2</sub> adsorption/desorption isotherms of P(Py:BPDSA:Py) and P(Py:BPDSA:Py)-MoS<sub>2</sub> (MoS<sub>2</sub> 50%).

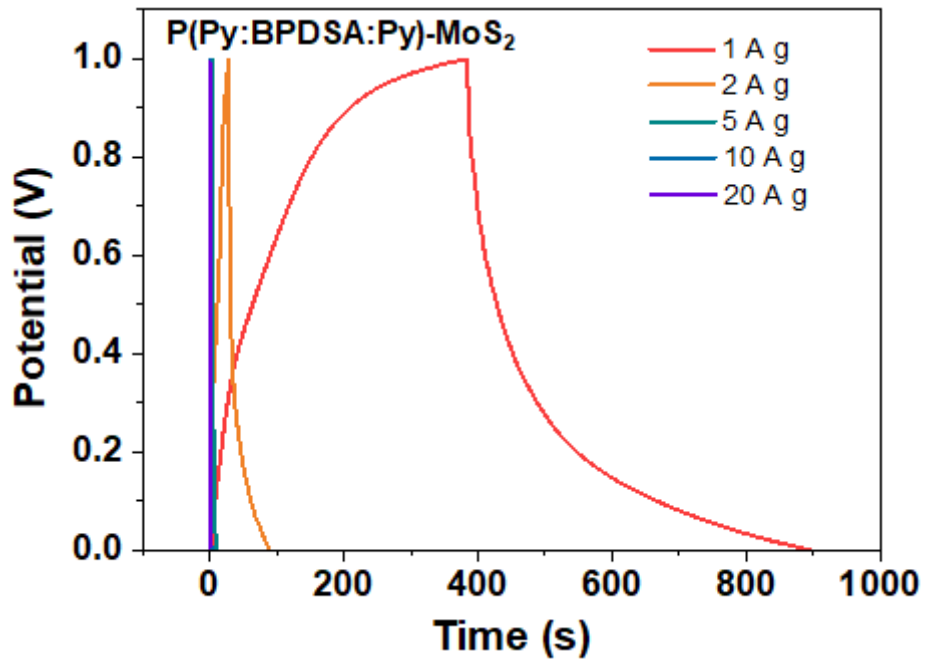

Fig. S9 Galvanostatic charge/discharge measurement of P(Py:BPDSA:Py)-MoS<sub>2</sub> (MoS<sub>2</sub> 50%) at various current densities.

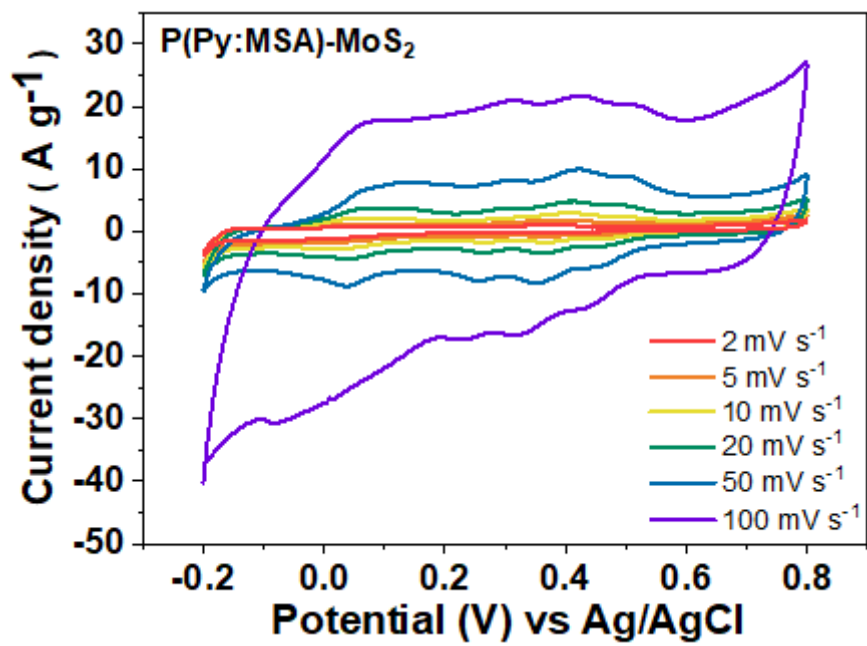

Fig. S10 CV curves of P(Py:MSA)-MoS<sub>2</sub> (MoS<sub>2</sub> 50%) at various scan rates.

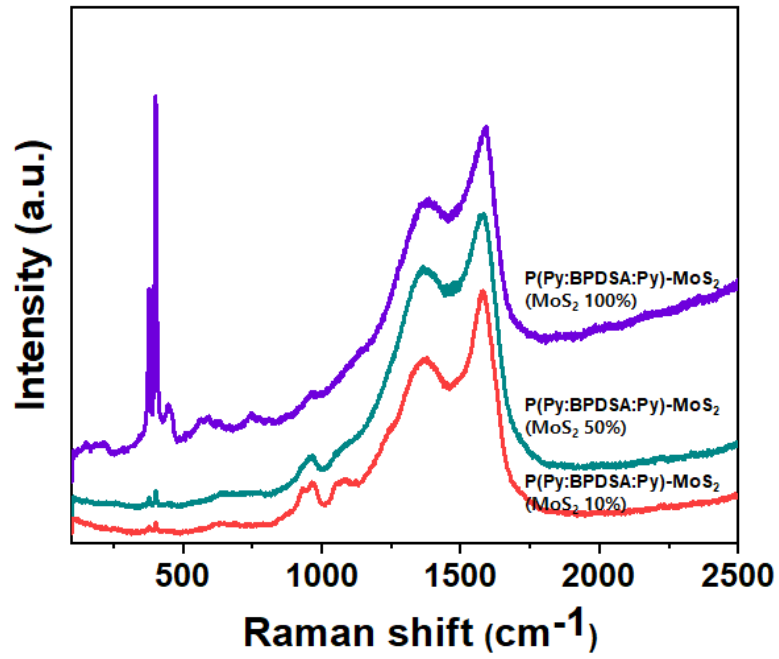

**Fig. S11** Raman spectroscopy of composite, P(Py:BPDSA:Py)-MoS<sub>2</sub> (MoS<sub>2</sub> - 10, 50, 100%). The characteristic peak of MoS<sub>2</sub> appears stronger in the composite, P(Py:BPDSA:Py)-MoS<sub>2</sub> (MoS<sub>2</sub> 100%).

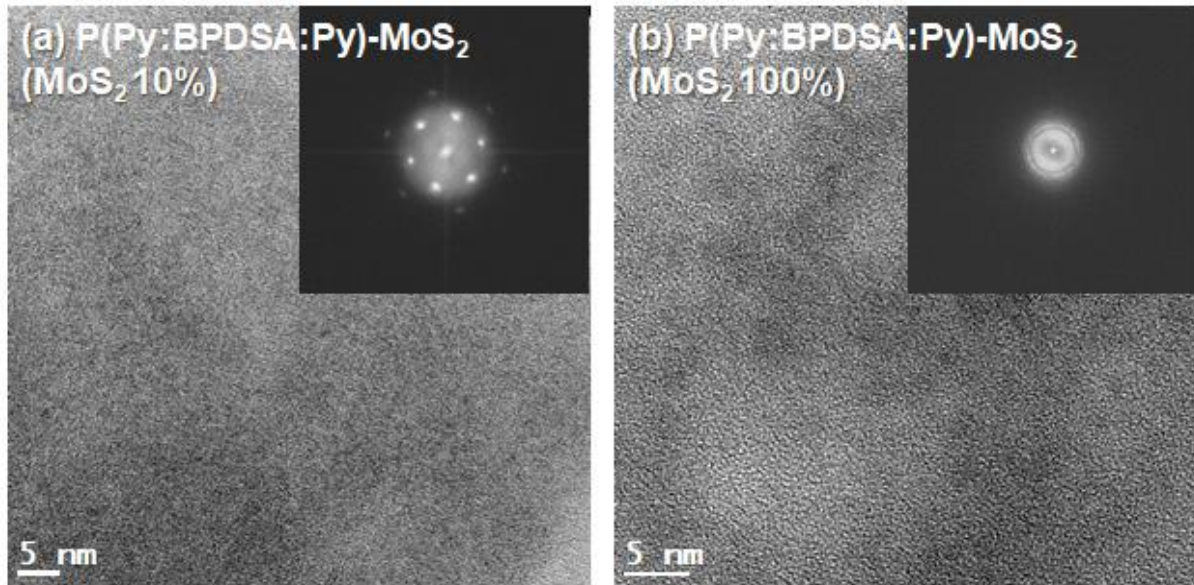

**Fig. S12** HRTEM and processed FFT pattern images of P(Py:BPDSA:Py)-MoS<sub>2</sub> (MoS<sub>2</sub> - 10, 100%). As the mass of MoS<sub>2</sub> increases, the crystallinity of the composite decreases. It can be inferred that the increased MoS<sub>2</sub> monolayers may aggregate and interfere with the crystal growth of the polymer.

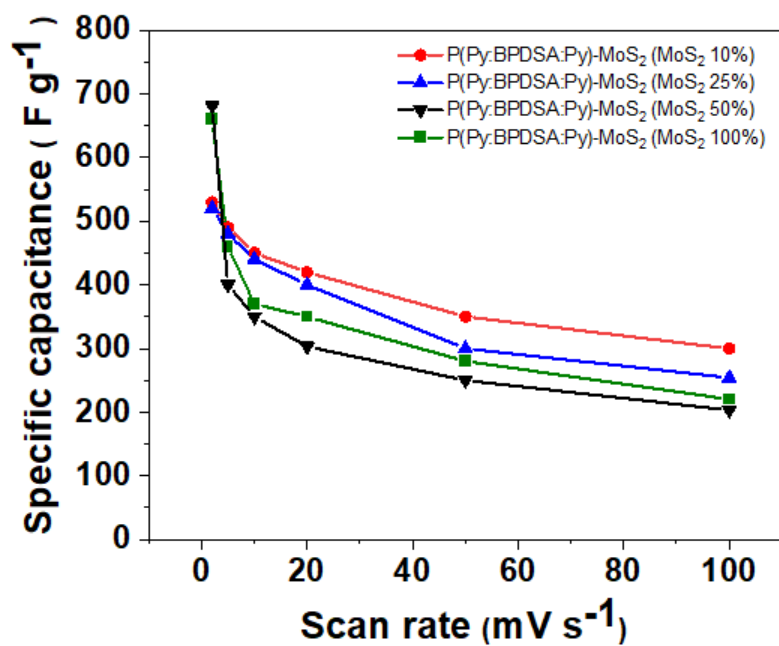

**Fig. S13** Specific capacitances of composites, P(Py:BPDSA:Py)-MoS<sub>2</sub> (MoS<sub>2</sub> - 10, 25, 50, 100%), at various scan rates. As the mass of MoS<sub>2</sub> increases, the specific capacitances of the composite also increase at 2 mV s<sup>-1</sup>, but the rate capability decreases. It can be inferred that if the crystalline polymer is simply increased, the polymer grows thickly on the MoS<sub>2</sub> even though the crystallinity of the composite increases, which leads to a decrease in the porosity and thus the ion mobility, but rate capability retains because of the polymer crystal effect to the stability.

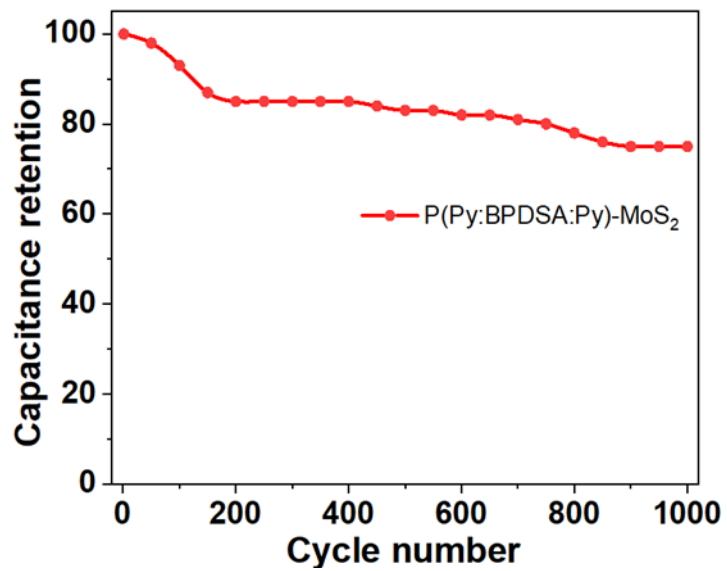

**Fig. S14** Capacitance retention of composite, P(Py:BPDSA:Py)-MoS<sub>2</sub> (MoS<sub>2</sub> 50%), at a scan rate of 10 mV s<sup>-1</sup>



**Table S1** The capacitances of the MoS<sub>2</sub> based materials reported in the literatures.

| Electrode active material              | Electrolyte                           | Scan rate<br>or<br>current<br>density | Specific capacitance<br>(F g <sup>-1</sup> or F cm <sup>-3</sup> ) | Reference |
|----------------------------------------|---------------------------------------|---------------------------------------|--------------------------------------------------------------------|-----------|
| P(Py:BPDSA:Py)/MoS <sub>2</sub>        | 1 M H <sub>2</sub> SO <sub>4</sub>    | 2 mV s <sup>-1</sup>                  | 681 (3-electrodes)                                                 | This work |
| PPy/MoS <sub>2</sub>                   | 1 M KCl                               | 0.5 A g <sup>-1</sup>                 | 695 (2-electrodes)                                                 | 1         |
| PPy/MoS <sub>2</sub>                   | 1 M KCl                               | 1 A g <sup>-1</sup>                   | 554 (3-electrodes)                                                 | 2         |
| PPy/MoS <sub>2</sub>                   | 0.5 M Na <sub>2</sub> SO <sub>4</sub> | 1 A g <sup>-1</sup>                   | 462 (3-electrodes)                                                 | 3         |
| PPy/MoS <sub>2</sub> -DBS              | 1 M LiCl                              | 0.5<br>mA/cm <sup>2</sup>             | 325 (3-electrodes)                                                 | 4         |
| PANI/MoS <sub>2</sub>                  | 1 M H <sub>2</sub> SO <sub>4</sub>    | 1 A g <sup>-1</sup>                   | 575 (3-electrodes)                                                 | 5         |
| PANI/MoS <sub>2</sub>                  | KOH                                   | 1 A g <sup>-1</sup>                   | 510.12 (3-electrodes)                                              | 6         |
| PANI/MoS <sub>2</sub>                  | 0.5 M H <sub>2</sub> SO <sub>4</sub>  | 1 A g <sup>-1</sup>                   | 450 (3-electrodes)                                                 | 7         |
| PANI/MoS <sub>2</sub>                  | 1 M H <sub>2</sub> SO <sub>4</sub>    | 5 mV s <sup>-1</sup>                  | 364 (3-electrodes)                                                 | 8         |
| PANI/MoS <sub>2</sub>                  | 1 M H <sub>2</sub> SO <sub>4</sub>    | 10 A g <sup>-1</sup>                  | 245.5 (3-electrodes)                                               | 9         |
| PANI/MoS <sub>2</sub> -NH <sub>2</sub> | 1 M H <sub>2</sub> SO <sub>4</sub>    | 0.5 A g <sup>-1</sup>                 | 326.4 (3-electrodes)                                               | 10        |
| PANI/CNT/MoS <sub>2</sub>              | 1 M H <sub>2</sub> SO <sub>4</sub>    | 1 A g <sup>-1</sup>                   | 350 (2-electrodes)                                                 | 11        |
| PEDOT/MoS <sub>2</sub>                 | 2 M HCl                               | 5 mV s <sup>-1</sup>                  | 452 (3-electrodes)                                                 | 12        |

1. H. Tang, J. Wang, H. Yin, H. Zhao, D. Wang and Z. Tang, *Adv. Mater.*, 2015, **27**, 1117-1123.
2. G. Ma, H. Peng, J. Mu, H. Huang, X. Zhou and Z. Lei, *J. Power Sources*, 2013, **229**, 72-78.
3. Y. Chen, W. Ma, K. Cai, X. Yang and C. Huang, *Electrochim. Acta*, 2017, **246**, 615-624.
4. Y. Tian, J. Liu, X. Song, L. Zhao, P. Zhang and L. Gao, *Compos. Sci. Technol.*, 2020, **197**, 108263.
5. K.-J. Huang, L. Wang, Y.-J. Liu, H.-B. Wang, Y.-M. Liu and L.-L. Wang, *Electrochim. Acta*, 2013, **109**, 587-594.
6. S. A. Ansari, H. Fouad, S. Ansari, M. P. Sk and M. H. Cho, *J. Colloid Interface Sci.*, 2017, **504**, 276-282.

7. J. Lei, Z. Jiang, X. Lu, G. Nie and C. Wang, *Electrochim. Acta*, 2015, **176**, 149-155.
8. S. Zhang, X. Song, S. Liu, F. Sun, G. Liu and Z. Tan, *Electrochim. Acta*, 2019, **312**, 1-10.
9. J. Chao, J. Deng, W. Zhou, J. Liu, R. Hu, L. Yang, M. Zhu and O. G. Schmidt, *Electrochim. Acta*, 2017, **243**, 98-104.
10. R. Zeng, Z. Li, L. Li, Y. Li, J. Huang, Y. Xiao, K. Yuan and Y. Chen, *ACS Sustainable Chem. Eng.*, 2019, **7**, 11540-11549.
11. A. K. Thakur, A. B. Deshmukh, R. B. Choudhary, I. Karbhal, M. Majumder and M. V. Shelke, *Materials Science and Engineering: B*, 2017, **223**, 24-34.
12. T. Alamro and M. K. Ram, *Electrochim. Acta*, 2017, **235**, 623-631.
